# Supplementary material
Source: MDPI journal article supplement (https://www.mdpi.com/2311-7524/9/4/506)
Supplement: s1 [file s1]

**Table S1.** Relationship real dielectric permittivity and volumetric water content of tested soil: coefficients of regression equation.

|                     | $\theta = a \times \varepsilon^3 + b \times \varepsilon^2 + c \times \varepsilon + d$ |          |         |         |        |
|---------------------|---------------------------------------------------------------------------------------|----------|---------|---------|--------|
| Sensor-installation | a                                                                                     | b        | c       | d       | $R^2$  |
| CS-insert           | 1.6E-05                                                                               | -1.2E-03 | 3.9E-02 | 9.2E-02 | 0.9742 |
| HP-insert           | 9.9E-06                                                                               | -9.1E-04 | 3.5E-02 | 6.0E-02 | 0.9857 |
| HP-buried           | 2.2E-05                                                                               | -1.7E-03 | 4.9E-02 | 5.4E-03 | 0.9855 |

$\theta$ , volumetric water content ( $\text{m}^3 \text{ m}^{-3}$ );  $\varepsilon$ , real dielectric permittivity;  $R^2$ , coefficient of determination.
