# Supplementary material
Source: MDPI journal article supplement (https://www.mdpi.com/2311-7524/9/4/506)

(a)

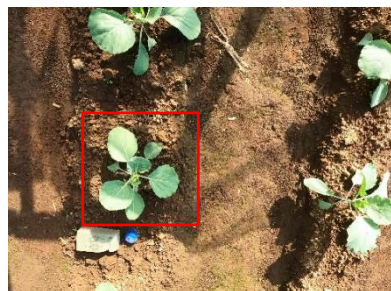

(b)

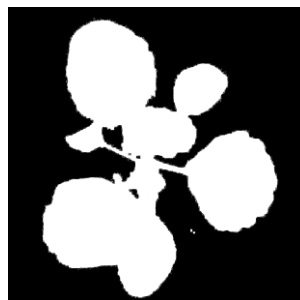

**Figure S1**

Supplement: s1 [file s1]

(a)

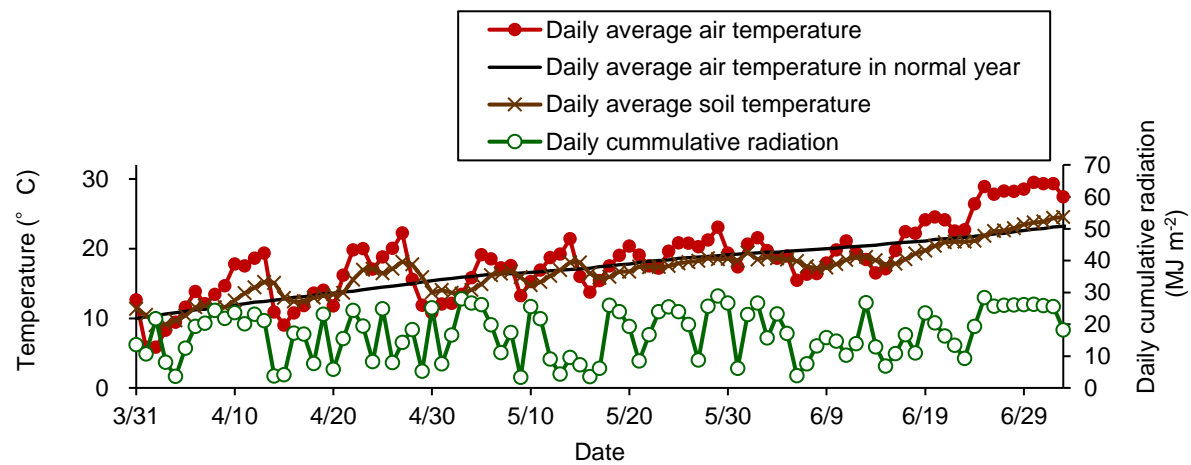

(b)

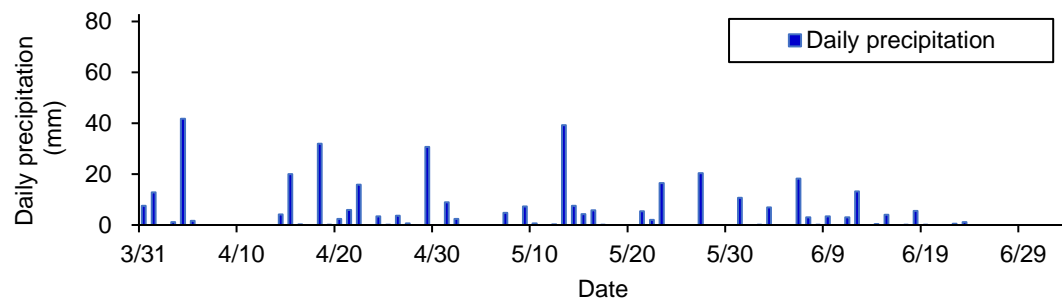

**Figure S2**

Supplement: s1 [file s1]
